# Supplementary material for: Multiple-Gene Regulation for Enhanced Antitumor Efficacy with Branch-PCR-Assembled TP53 and MYC Gene Nanovector
Source: MDPI journal article supplement (doi:10.3390/molecules27206943), 2022-10-16
Supplement: s1 [file s1]

# Supporting Information

## **Multiple gene regulation for enhanced antitumor efficacy with branch-PCR assembled TP53 and MYC gene nanovector**

Longhuai Cheng,<sup>†1</sup> Liqing Lu,<sup>†1</sup> Ziyi Chen,<sup>1</sup> Dejun Ma,<sup>\*1</sup> and Zhen Xi<sup>\*1</sup>

<sup>1</sup> State Key Laboratory of Elemento-Organic Chemistry, and Department of Chemical Biology, National Pesticide Engineering Research Center, Collaborative Innovation Center of Chemical Science and Engineering, College of Chemistry, Nankai University, Tianjin 300071, P. R. China.

\*Correspondence: DM: madejun@nankai.edu.cn, ZX: zhenxi@nankai.edu.cn,

Tel: +86-022-23504782.

† The authors contributed equally to this work.

E-mail: madejun@nankai.edu.cn, zhenxi@nankai.edu.cn

**Table S1** Primer sequences of constructed P-TP53-shMYC plasmids

| Name       | Sequence (5'-3')                                       |
|------------|--------------------------------------------------------|
| F-TP53     | GGCGGGTGTGGTGGTTACGCGCAGC                              |
| R-TP53     | GCGCTTAATGCGCCGCTACAGGGCG                              |
| F-MYC-TP53 | <u>CGCCCTGTAGCGGCGCATTAAAGCGC</u> GAGGGCCTATTTCCCATGAT |
| R-MYC-TP53 | <u>GCTGCGCGTAACCACCACACCCGCC</u> CTCGAGAAAAAAGGAAACGA  |

**Table S2** Primer sequences of L-TP53

| Name     | Sequence (5'-3')                                 |
|----------|--------------------------------------------------|
| L-TP53-F | <b>CCTCCCAAGATGGCCCGATA</b> AGCTACAACAAGGCAAGGCT |
| L-TP53-R | <b>CCTCCTCTCCCTGTCCAAA</b> AGGAAAGGACAGTGGGAGTG  |

**Table S3** Primer sequences of L-shMYC

| Name    | Sequence (5'-3')                                 |
|---------|--------------------------------------------------|
| L-MYC-F | <b>CCTCCCAAGATGGCCCGATA</b> GAGGGCCTATTTCCCATGAT |
| L-MYC-R | <b>CCTCCTCTCCCTGTCCAAA</b> CTCGAGAAAAAAGGAAACGA  |

**Table S4** Primer sequences of L-TP53-shMYC

| Name         | Sequence (5'-3')                                 |
|--------------|--------------------------------------------------|
| L-TP53-MYC-F | <b>CCTCCCAAGATGGCCCGATA</b> AGCTACAACAAGGCAAGGCT |
| L-TP53-MYC-R | <b>CCTCCTCTCCCTGTCCAAA</b> CTCGAGAAAAAAGGAAACGA  |

**Table S5** DNA sequence of L-TP53-shMYC cassette

|      |                   |                   |                   |                   |                   |                                |
|------|-------------------|-------------------|-------------------|-------------------|-------------------|--------------------------------|
| 1    | <u>CCTCCAAGA</u>  | <u>TGGCCCGATA</u> | <u>AGCTACAACA</u> | <u>AGGCAAGGCT</u> | TGACCGACAA        | TTGCATGAAG                     |
| 61   | AATCTGCTTA        | GGGTTAGGCG        | TTTTCGCTG         | CTTCGCGATG        | TACGGGCCAG        | ATATACGCGT                     |
| 121  | TGACATTGAT        | TATTGACTAG        | TTATTAATAG        | TAATCAATTA        | CGGGGTCATT        | AGTTCATAGC                     |
| 181  | CCATATATGG        | AGTTCCGCGT        | TACATAACTT        | ACGGTAAATG        | GCCCGCCTGG        | CTGACCGCCC                     |
| 241  | AACGACCCCC        | GCCCATTGAC        | GTCAATAATG        | ACGTATGTTC        | CCATAGTAAC        | GCCAATAGGG                     |
| 301  | ACTTTCCATT        | GACGTCAATG        | GGTGGAGTAT        | TTACGGTAAA        | CTGCCCACTT        | GGCAGTACAT                     |
| 361  | CAAGTGTATC        | ATATGCCAAG        | TACGCCCCCT        | ATTGACGTCA        | ATGACGGTAA        | ATGGCCCCGC                     |
| 421  | TGGCATTATG        | CCCAGTACAT        | GACCTTATGG        | GACTTTCCTA        | CTTGGCAGTA        | CATCTACGTA                     |
| 481  | TTAGTCATCG        | CTATTACCAT        | GGTGATGCGG        | TTTTGGCAGT        | ACATCAATGG        | GCGTGGATAG                     |
| 541  | CGGTTTGACT        | CACGGGGATT        | TCCAAGTCTC        | CACCCCATTG        | ACGTCAATGG        | GAGTTTGTTT                     |
| 601  | TGGCACCAAA        | ATCAACGGGA        | CTTTCCAAAA        | TGTCGTAACA        | ACTCCGCCCC        | ATTGACGCAA                     |
| 661  | ATGGGCGGTA        | GGCGTGACG         | GTGGGAGGTC        | TATATAAGCA        | GAGCTCTCTG        | GCTAACTAGA                     |
| 721  | GAACCCACTG        | CTTACTGGCT        | TATCGAAAT         | <u>AATACGACTC</u> | <u>ACTATAGGGA</u> | GACCCAAGCT                     |
| 781  | TACCATGGCC        | TACCCCTACG        | ACGTGCCCCG        | CTACGCCTCC        | CTCGGATCCG        | AGGAGCCGCA                     |
| 841  | GTCAGATCCT        | AGCGTCGAGC        | CCCCTCTGAG        | TCAGGAAACA        | TTTTCAGACC        | TATGGAAACT                     |
| 901  | ACTTCCTGAA        | AACAACGTTC        | TGTCCCCCTT        | GCCGTCCCAA        | GCAATGGATG        | ATTTGATGCT                     |
| 961  | GTCCCCGGAC        | GATATTGAAC        | AATGGTTCAC        | TGAAGACCCA        | GGTCCAGATG        | AAGCTCCCAG                     |
| 1021 | AATGCCAGAG        | GCTGCTCCCC        | CCGTGGCCCC        | TGCACCAGCA        | GCTCCTACAC        | CGGCGGCCCC                     |
| 1081 | TGCACCAGCC        | CCCTCCTGGC        | CCCTGTCATC        | TTCTGTCCCT        | TCCCAGAAAA        | CCTACCAGGG                     |
| 1141 | CAGCTACGGT        | TTCCGTCTGG        | GCTTCTTGCA        | TTCTGGGACA        | GCCAAGTCTG        | TGACTTGCAC                     |
| 1201 | GTAATCCCTT        | GCCCTCAACA        | AGATGTTTTG        | CCAATGGGCC        | AAGACCTGCC        | CTGTGCAGCT                     |
| 1261 | GTGGGTTGAT        | TCCACACCCC        | CGCCCGGCAC        | CCGCGTCCGC        | GCCATGGCCA        | TCTACAAGCA                     |
| 1321 | GTCACAGCAC        | ATGACGGAGG        | TTGTGAGGCG        | CTGCCCCCAC        | CATGAGCGCT        | GCTCAGATAG                     |
| 1381 | CGATGGTCTG        | GCCCTCCTC         | AGCATCTTAT        | CCGAGTGGAA        | GGAAATTTGC        | GTGTGGAGTA                     |
| 1441 | TTTGATGAC         | AGAAACACTT        | TTCGACATAG        | TGTGGTGGTG        | CCCTATGAGC        | CGCCTGAGGT                     |
| 1501 | TGGCTCAGAC        | TGTACCACCA        | TCCACTACAA        | CTACATGTGT        | AACAGTTCCT        | GCATGGGCGG                     |
| 1561 | CATGAACCGG        | AGGCCCATCC        | TCACCATCAT        | CACACTGGAA        | GACTCCAGTG        | GTAATCTACT                     |
| 1621 | GGGACGGAAC        | AGCTTTGAGG        | TGCGTGTTTG        | TGCCTGTCCT        | GGGAGAGACC        | GGCGCACAGA                     |
| 1681 | GGAAGAGAAT        | CTCCGCAAGA        | AAGGGGAGCC        | TCACCACGAG        | CTGCCCCCAG        | GGAGCACTAA                     |
| 1741 | GCGAGCACTG        | CCCAACAACA        | CCAGCTCCTC        | TCCCCAGCCA        | AAGAAGAAAC        | CACTGGATGG                     |
| 1801 | AGAATATTTC        | ACCCTTCAGA        | TCCGTGGGCG        | TGAGCGCTTC        | GAGATGTTCC        | GAGAGCTGAA                     |
| 1861 | TGAGGCCTTG        | GAACTCAAGG        | ATGCCAGGC         | TGGGAAGGAG        | CCAGGGGGGA        | GCAGGGCTCA                     |
| 1921 | CTCCAGCCAC        | CTGAAGTCCA        | AAAAGGGTCA        | GTCTACCTCC        | CGCCATAAAA        | AACTCATGTT                     |
| 1981 | CAAGACAGAA        | GGGCCTGACT        | CAGACTGAGA        | <u>ATTCTGCAGA</u> | TATCCATCAC        | ACTGGCGGCC                     |
| 2041 | GCTCGAGCAT        | GCATCTAGAG        | GGCCCTATTC        | TATAGTGTC         | CCTAAATGCT        | AGAGCTCGCT                     |
| 2101 | GATCAGCCTC        | GACTGTGCCT        | TCTAGTTGCC        | AGCCATCTGT        | TGTTTGCCCC        | TCCCCCGTGC                     |
| 2161 | CTTCCTTGAC        | CCTGGAAGGT        | GCCACTCCCA        | CTGTCCTTTC        | CTAATAAAAT        | GAGGAAATTG                     |
| 2221 | CATCGCATTG        | TCTGAGTAGG        | TGTCATTCTA        | TTCTGGGGGG        | TGGGGTGGGG        | CAGGACAGCA                     |
| 2281 | AGGGGGAGGA        | TTGGGAAGAC        | AATAGCAGGC        | ATGCTGGGGA        | TGCGGTGGGC        | TCTATGGCTT                     |
| 2341 | CTGAGGCGGA        | AAGAACCAGC        | TGGGGCTCTA        | GGGGGTATCC        | CCACG             | <u>CGCCC</u> <u>TGTAGCGGCC</u> |
| 2401 | <u>CATTAAGCGC</u> | GAGGGCCTAT        | TTCCCATGAT        | TCCTTCATAT        | TTGCATATAC        | GATACAAGGC                     |
| 2461 | TGTTAGAGAG        | ATAATTGGAA        | TTAATTTGAC        | TGTAAACACA        | AAGATATTAG        | TACAAAATAC                     |

|      |            |            |            |            |            |            |
|------|------------|------------|------------|------------|------------|------------|
| 2521 | GTGACGTAGA | AAGTAATAAT | TTCTTGGGTA | GTTTGCAGTT | TTAAAATTAT | GTTTAAAAAT |
| 2581 | GGACTATCAT | ATGCTTACCG | TAACCTGAAA | GTATTTCGAT | TTCTTGGCTT | TATATATCTT |
| 2641 | GTGGAAAGGA | CGAAACACCG | CTTCACCAAC | AGGAACTATG | CGAACATAGT | TCCTGTTGGT |
| 2701 | GAAGCCACAG | TTCGGTAAGG | GAGAGAGAAT | GTCAAGAGGC | GAACACGAAT | GTTCGCCTCT |
| 2761 | TGACATTCTC | CACAGTTCGG | TAAGGGAGAG | CTCATTCTG  | AAGAGGACTT | CGAAAAGTCC |
| 2821 | TCTTCAGAAA | TGAGCCACAG | TTCGGTAAGG | GAGAGGAAAC | GACGAGAACA | GTTGACGAAT |
| 2881 | CAACTGTTCT | CGTCGTTTCC | TTTTTCTCG  | AGTTGGACA  | GGAAGAGGA  | GG         |

**Table S6** DNA sequences of F<sup>3</sup> and R<sup>3</sup> primers

| Name           | Sequence(5'-3')      |
|----------------|----------------------|
| F <sup>3</sup> | CCTCCCAAGATGGCCCGATA |
| R <sup>3</sup> | CCTCCTCTTCCCTGTCCAAA |

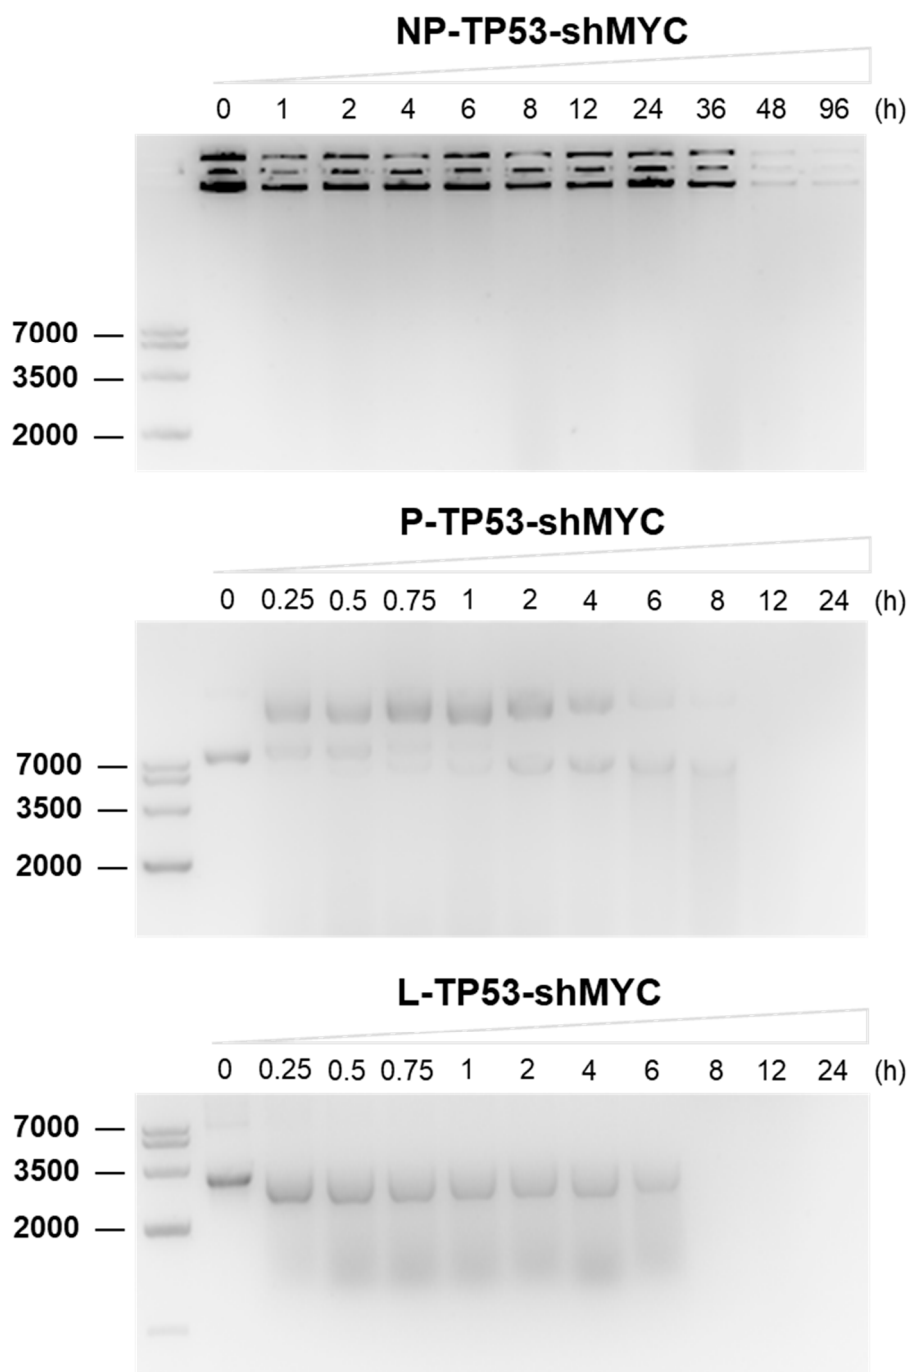

**Figure S1.** Serum stability assay. 5  $\mu$ g DNA (NP-TP53-shMYC, P-TP53-shMYC, or L-TP53-shMYC) was incubated at 37°C in 30% fetal bovine serum (FBS) with  $\text{Mg}(\text{OAc})_2$  (0.25  $\mu$ M) in 50  $\mu$ L reaction. Aliquots (5  $\mu$ L) were taken at different time (0, 0.25, 0.5, 0.75, 1, 2, 4, 6, 8, 12, 24, 36, 48 and 96 h) and were analyzed by 1% agarose gel.

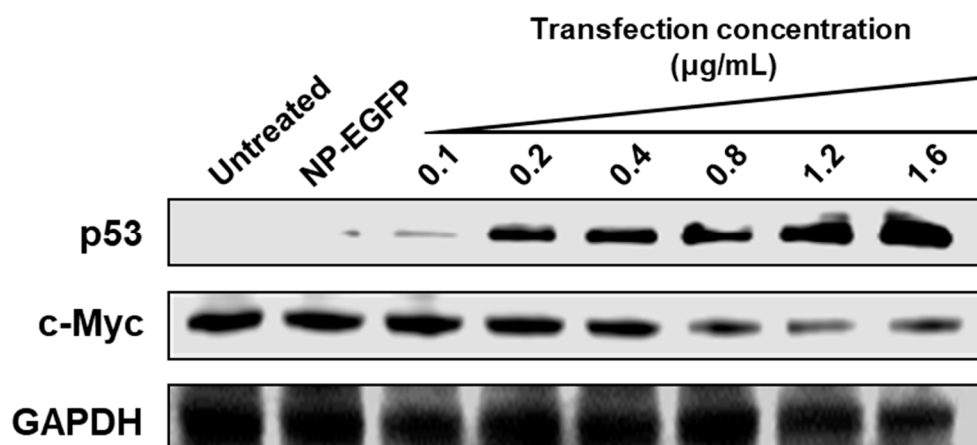

**Figure S2.** The expression of p53 proteins and c-Myc proteins was quantified by Western blotting. NP-TP53-shMYC nanovectors at different concentrations were transfected into MDA-MB-231 cells for 48 h.

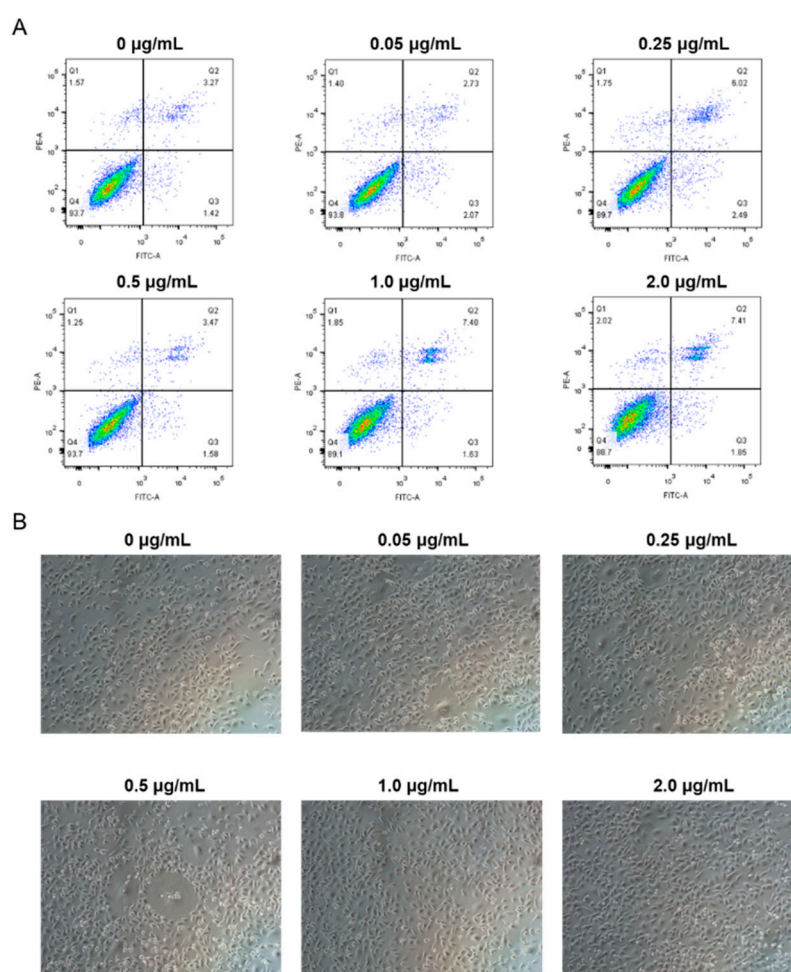

**Figure S3.** Flow cytometry assay of anti-cancer activity of NP-EGFP. (A) Dose-dependent apoptosis induction of MDA-MB-231 cells after transfection by 1% lipofectamine 2000 with different concentrations of NP-EGFP for 48 h. FITC-labeled Annexin V and PI were

used to discriminate the apoptosis; (B) The image of cell morphology at 48 h of post-transfection.

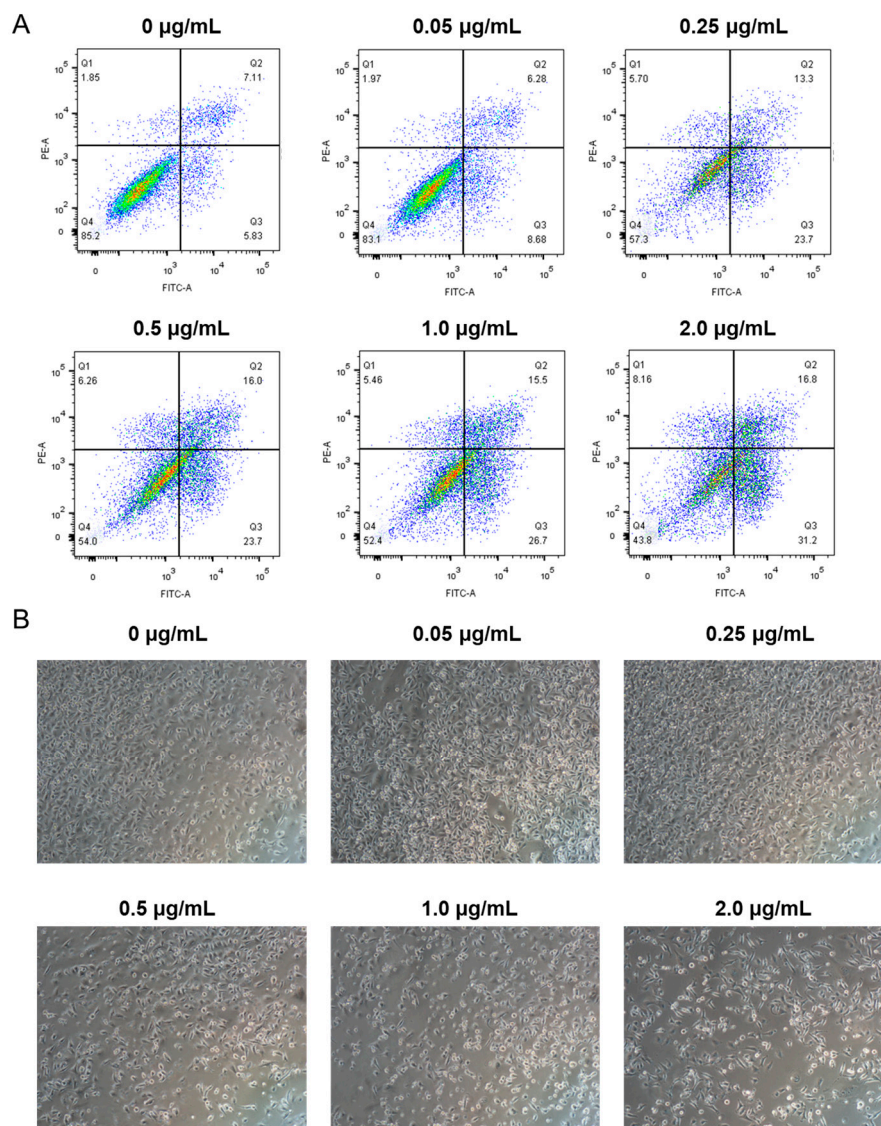

**Figure S4.** Flow cytometry assay of anti-cancer activity of NP-TP53. (A) Dose-dependent apoptosis induction of MDA-MB-231 cells after transfection by 1% lipofectamine 2000 with different concentrations of NP-TP53 for 48 h. FITC-labeled Annexin V and PI were used to discriminate the apoptosis; (B) The image of cell morphology at 48 h of post-transfection.

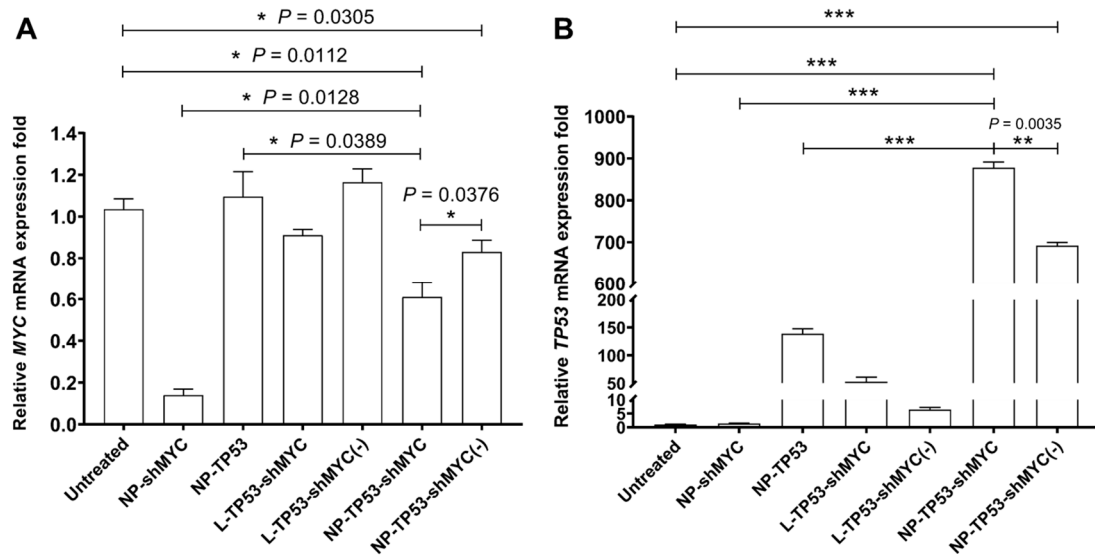

**Figure S5.** Quantitative analysis of the relative expression fold of *MYC* mRNA and *TP53* mRNA in the tumors at 7 days post-administration. A) the histogram of relative *MYC* mRNA expression fold; B) the histogram of relative *TP53* mRNA expression fold. Untreated: the saline treatment; L-TP53-shMYC: linear DNA formulated with Lipofectamine 2000; L-TP53-shMYC(-): L-TP53-shMYC without the help of Lipofectamine 2000; NP-TP53: gene nanovectors expressing TP53 formulated with Lipofectamine 2000; NP-shMYC: gene nanovectors expressing MYC shRNA array formulated with Lipofectamine 2000; NP-TP53-shMYC: gene nanovectors expressing TP53 and MYC shRNA array formulated with Lipofectamine 2000; NP-TP53-shMYC(-): NP-TP53-shMYC without the help of Lipofectamine 2000.



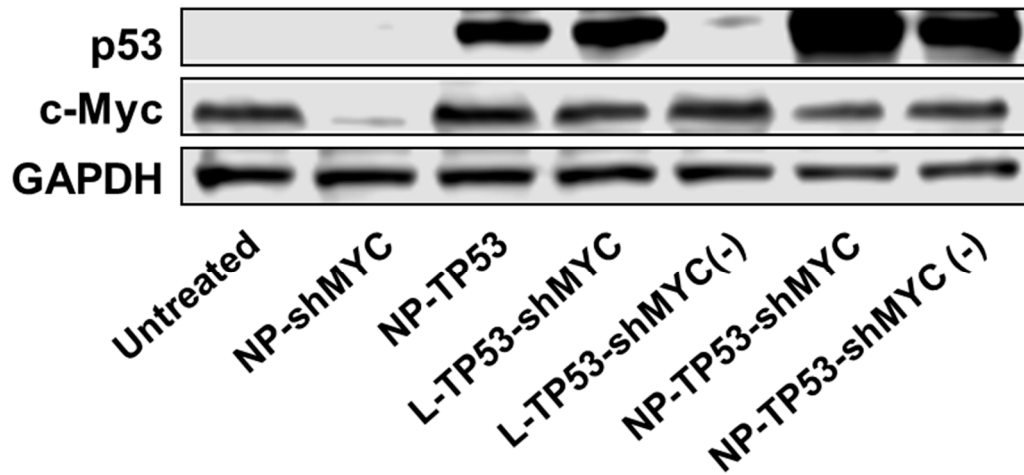

**Figure S6.** Western blotting analysis of p53 protein and c-Myc protein of tumor tissues at 7 days post-administration. Untreated: the saline treatment; L-TP53-shMYC: linear DNA formulated with Lipofectamine 2000; L-TP53-shMYC(-): L-TP53-shMYC without the help of Lipofectamine 2000; NP-TP53: gene nanovectors expressing TP53 formulated with Lipofectamine 2000; NP-shMYC: gene nanovectors expressing MYC shRNA array formulated with Lipofectamine 2000; NP-TP53-shMYC: gene nanovectors expressing TP53 and MYC shRNA array formulated with Lipofectamine 2000; NP-TP53-shMYC(-): NP-TP53-shMYC without the help of Lipofectamine 2000.

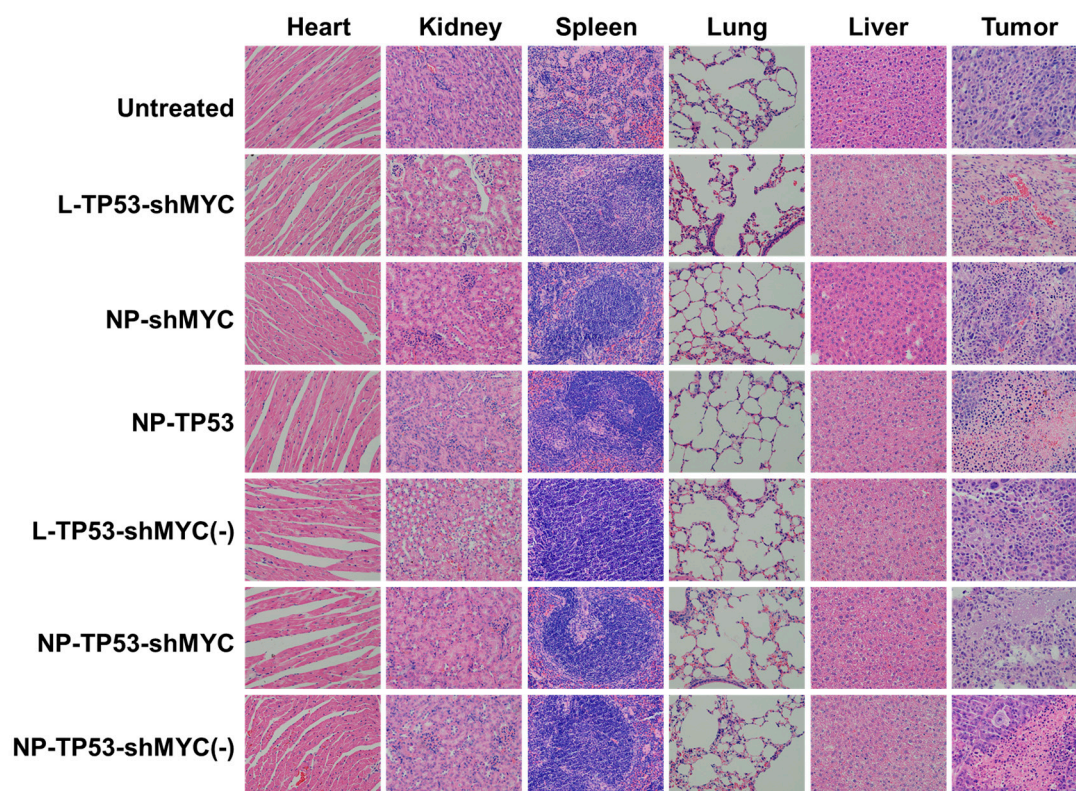

**Figure S7.** Histochemistry staining images of organs and tumor tissues from mice sacrificed on the 16<sup>th</sup> day after treatment with various nanovectors. Untreated: the saline treatment; L-TP53-shMYC: linear DNA formulated with Lipofectamine 2000; L-TP53-shMYC(-): L-TP53-shMYC without the help of Lipofectamine 2000; NP-TP53: gene nanovectors expressing TP53 formulated with Lipofectamine 2000; NP-shMYC: gene nanovectors expressing MYC shRNA array formulated with Lipofectamine 2000; NP-TP53-shMYC: gene nanovectors expressing TP53 and MYC shRNA array formulated with Lipofectamine 2000; NP-TP53-shMYC(-): NP-TP53-shMYC without the help of Lipofectamine 2000.

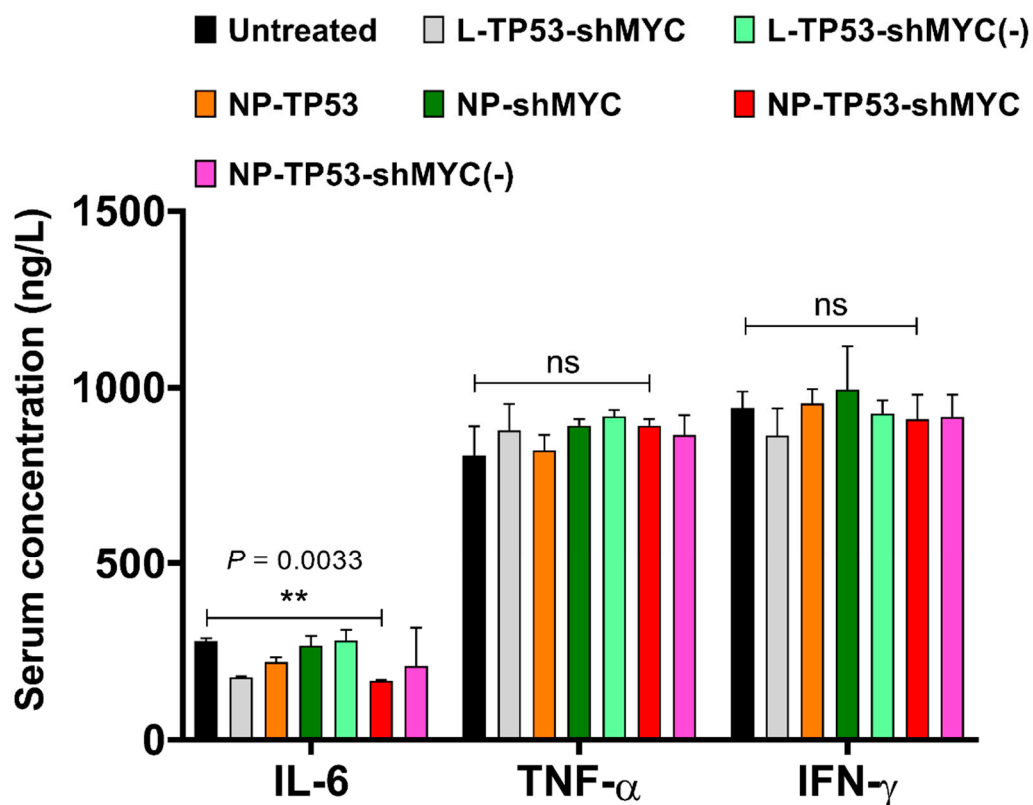

**Figure S8.** Analysis of immune cytokines levels (IL-6, TNF- $\alpha$  and IFN- $\gamma$ ) in the serum from mice sacrificed on the 16<sup>th</sup> day after treatment with various nanovectors. Untreated: the saline treatment; L-TP53-shMYC: linear DNA formulated with Lipofectamine 2000; L-TP53-shMYC(-): L-TP53-shMYC without the help of Lipofectamine 2000; NP-TP53: gene nanovectors expressing TP53 formulated with Lipofectamine 2000; NP-shMYC: gene nanovectors expressing MYC shRNA array formulated with Lipofectamine 2000; NP-TP53-shMYC: gene nanovectors expressing TP53 and MYC shRNA array formulated with Lipofectamine 2000; NP-TP53-shMYC(-): NP-TP53-shMYC without the help of Lipofectamine 2000.
